# Supplementary material for: Revisiting urea-based gelators: strong solvent- and casting-microstructure dependencies and organogel processing using an alumina template
Source: Royal Society of Chemistry journal article supplement (doi:10.1039/c4nj00681j), 2014-01-01

ARTICLE

## Revisiting urea-based gelators: strong solvent- and casting-microstructuration dependencies and organogel processing with an alumina template

Thanh-Loan Lai,<sup>a</sup> David Canevet,<sup>a\*</sup> Yasser Almohamed,<sup>a</sup> Jean-Yves Mévellec,<sup>b</sup> Régis Barillé,<sup>a</sup> Narcis Avarvari<sup>a\*</sup> and Marc Sallé<sup>a\*</sup>

|                                                                                                                                                                                                                            |     |
|----------------------------------------------------------------------------------------------------------------------------------------------------------------------------------------------------------------------------|-----|
| <b>Fig. S1</b> Teas diagram including the set of solvents under consideration                                                                                                                                              | p 2 |
| <b>Fig. S2</b> <sup>1</sup> H NMR spectrum of compound <b>1</b> in DMSO-D <sub>6</sub> at 393 K                                                                                                                            | p 2 |
| <b>Fig. S3</b> <sup>1</sup> H NMR spectrum of compound <b>2</b> in DMSO-D <sub>6</sub> at 393 K                                                                                                                            | p 3 |
| <b>Table S1.</b> Images of <b>1</b> -based xerogels by optical microscopy depending on the solvent of preparation and the casting method ( <i>the corresponding gels were prepared at a concentration C = 1.25 x CGC</i> ) | p 4 |
| <b>Table S2.</b> Images of <b>2</b> -based xerogels by optical microscopy depending on the solvent of preparation (the corresponding gels were prepared at a concentration C = 1.25 x CGC and deposited as such)           | p 5 |
| <b>Table S3.</b> Images of <b>2</b> -based xerogels by optical microscopy depending on the solvent of preparation (the corresponding gels were prepared at a concentration C = 1.25 x CGC and drop-casted).                | p 6 |
| <b>Table S4.</b> Images of the slice, upper and lower faces of the alumina membranes by SEM microscopy depending on the method of deposition.                                                                              | p 7 |
| <b>Fig. S4</b> NMR spectra of a sample of compound <b>1</b> before and after a DSC cycle (30°C → 120°C → 30°C).                                                                                                            | p 9 |
| <b>Fig. S5</b> SEM micrographs of the <b>2</b> -based xerogel prepared from <i>o</i> DCB after one week in a 5M NaOH aqueous solution at 80°C                                                                              | p 9 |

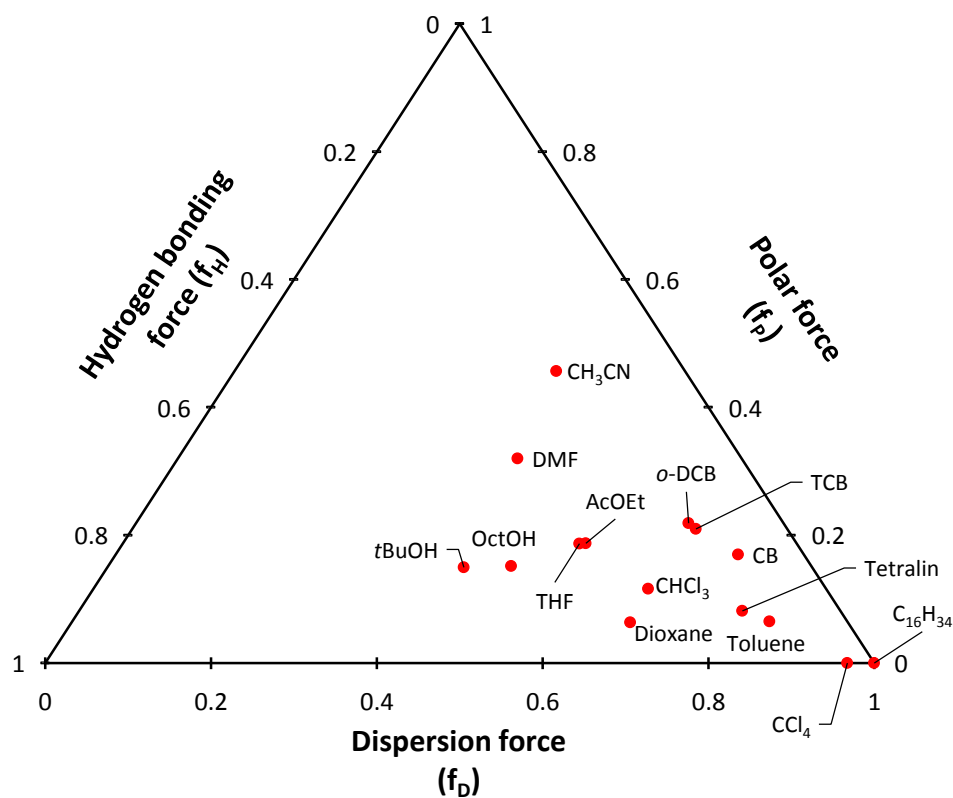

**Fig. S1** Teas diagram including the set of solvents under consideration

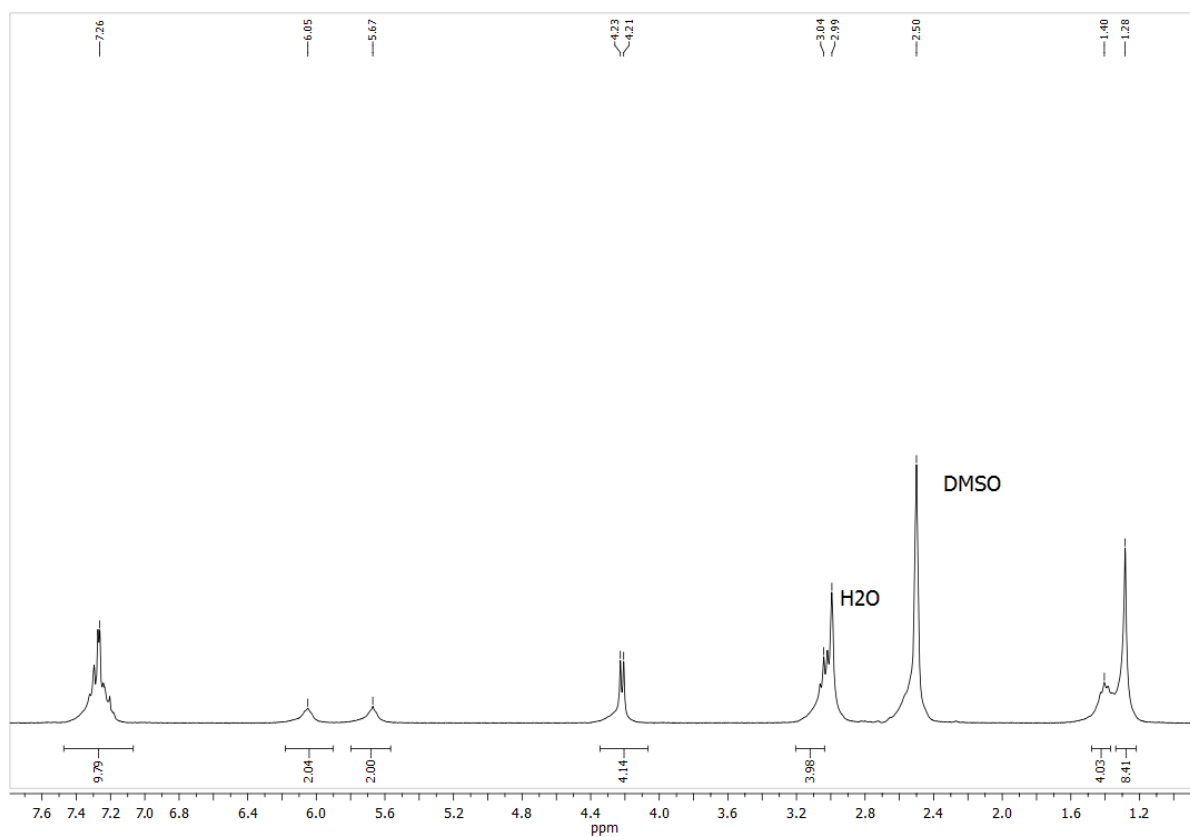

**Fig. S2**  $^1\text{H}$  NMR spectrum of compound **1** in  $\text{DMSO-D}_6$  at 393 K

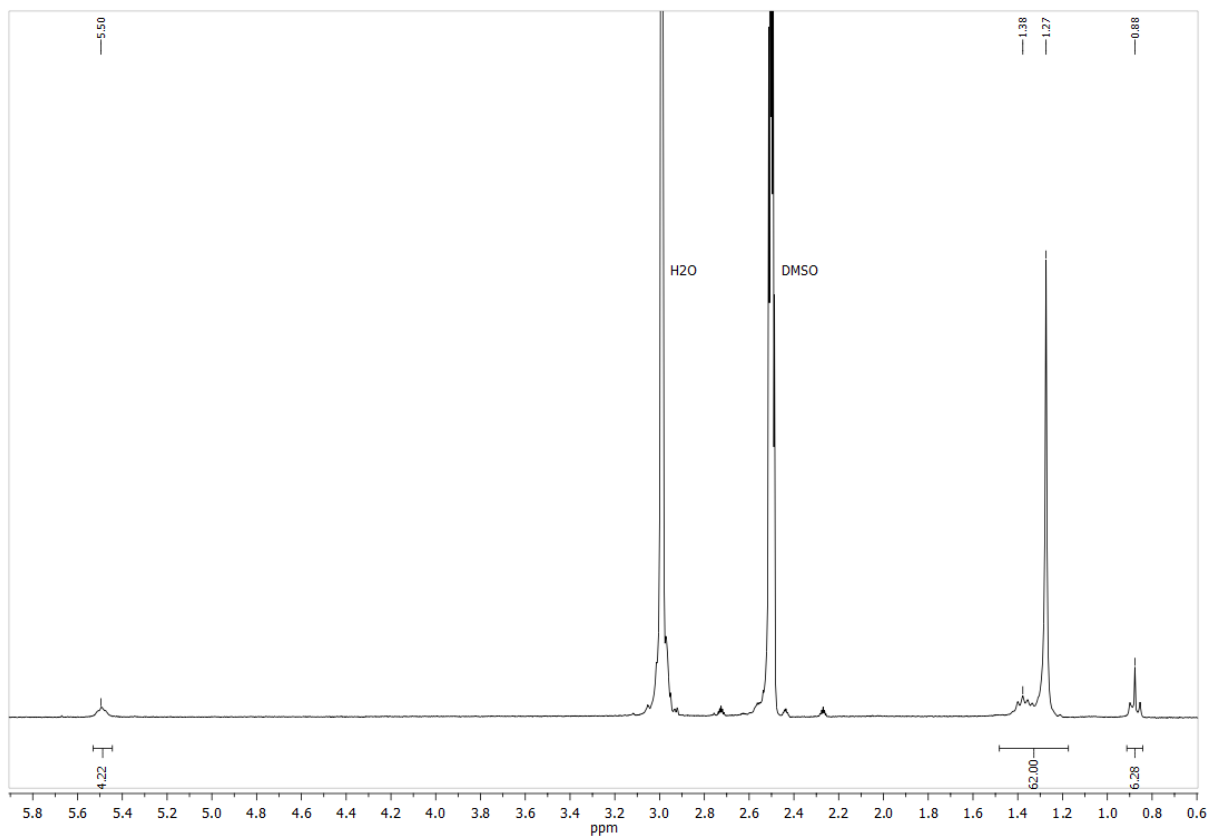

**Fig. S3**  $^1\text{H}$  NMR spectrum of compound 2 in  $\text{DMSO-D}_6$  at 393 K

**Table S1.** Images of 1-based xerogels by optical microscopy depending on the solvent of preparation and on the casting method (*the corresponding gels were prepared at a concentration  $C = 1.25 \times CGC$* )

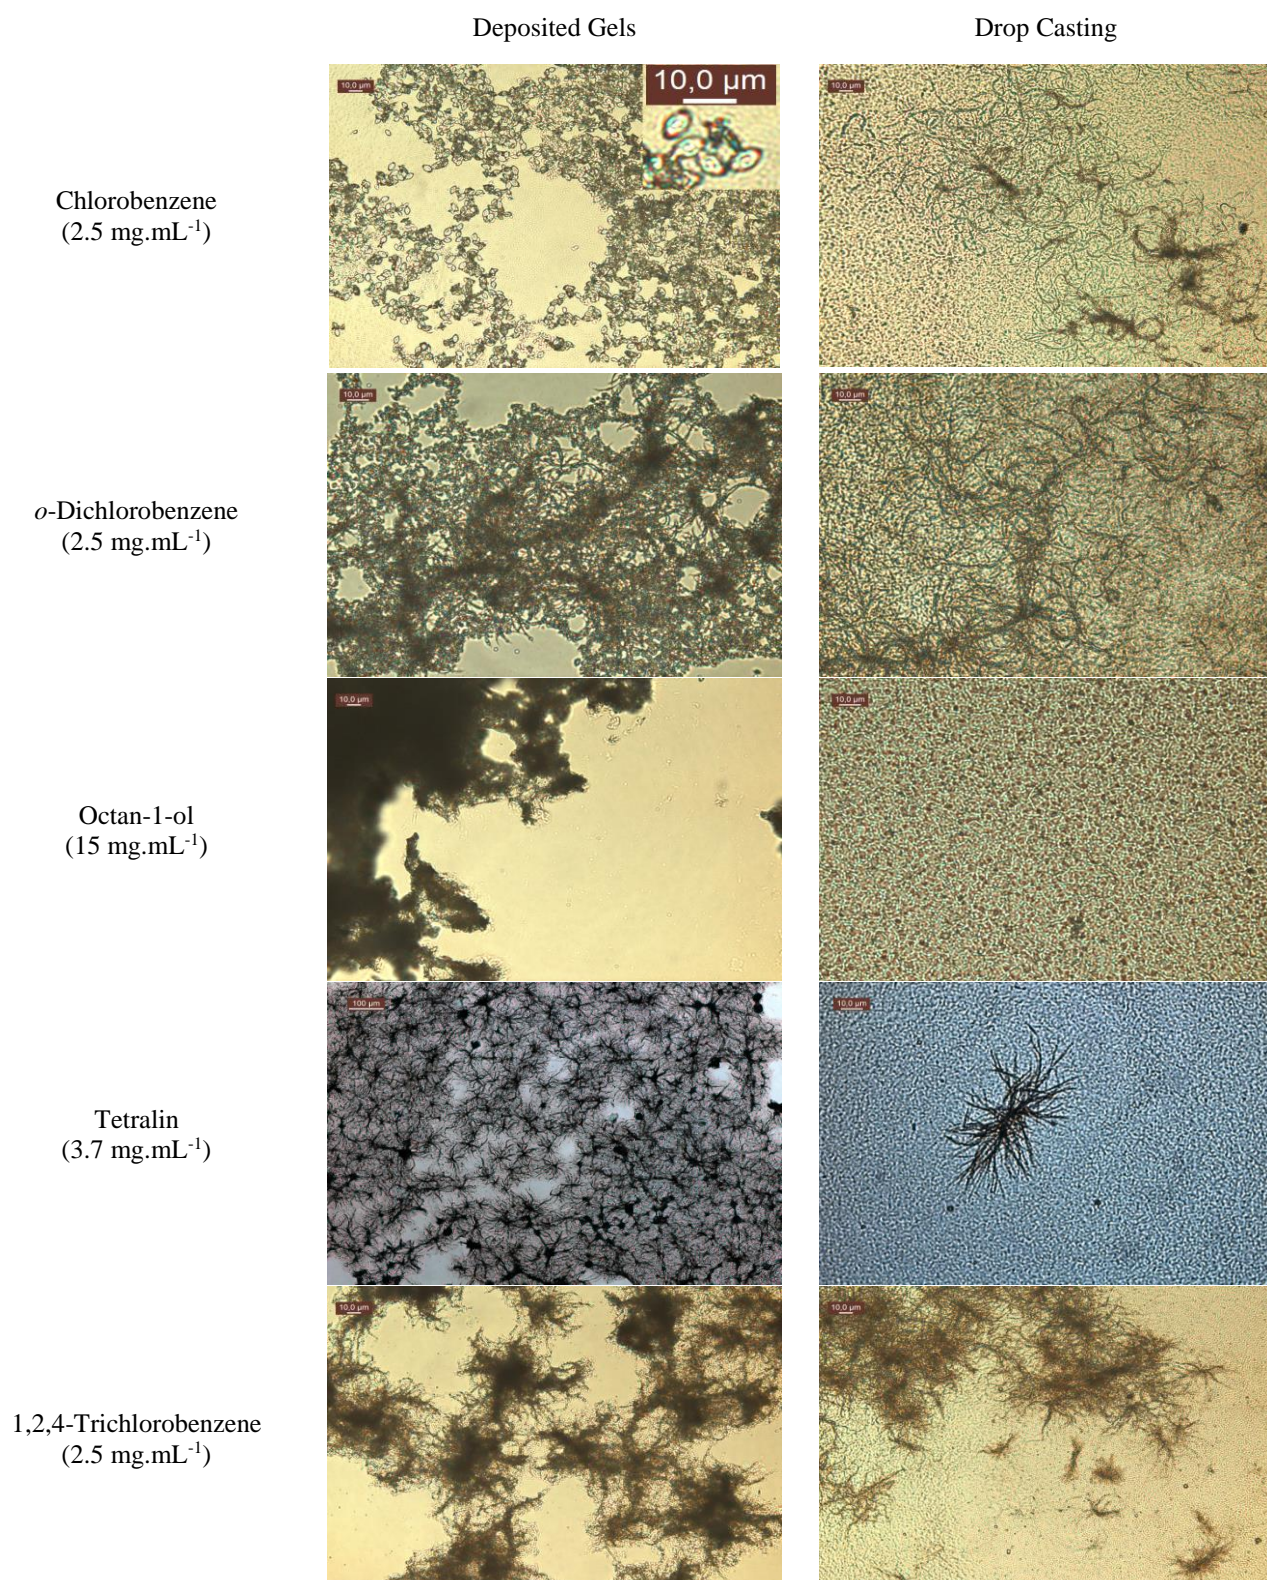

**Table S2.** Images of 2-based xerogels by optical microscopy depending on the solvent of preparation (the corresponding gels were prepared at a concentration  $C = 1.25 \times \text{CGC}$  and deposited as such)

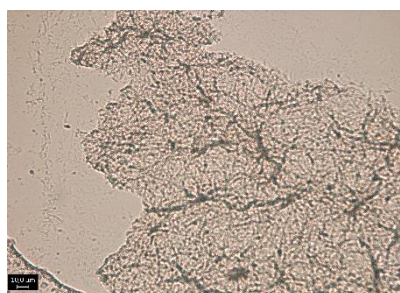

Chloroform  
(2.5 mg.mL<sup>-1</sup>)

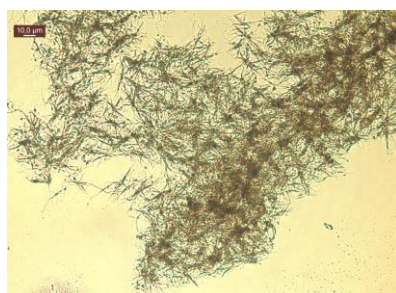

Tetrahydrofurane  
(2.5 mg.mL<sup>-1</sup>)

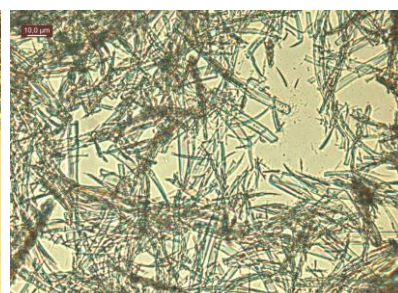

*tert*-Butanol  
(7.5 mg.mL<sup>-1</sup>)

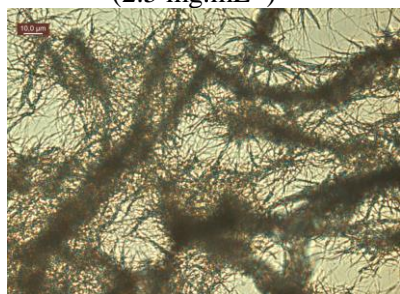

1,4-Dioxane  
(3.7 mg.mL<sup>-1</sup>)

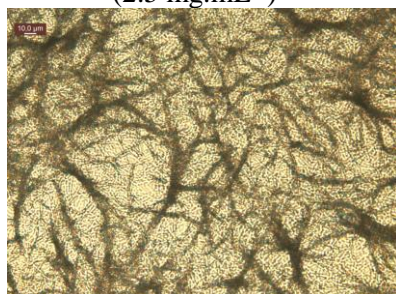

Toluene  
(2.5 mg.mL<sup>-1</sup>)

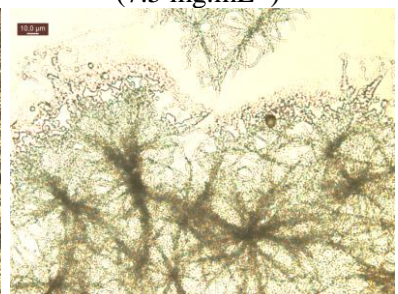

Chlorobenzene  
(2.5 mg.mL<sup>-1</sup>)

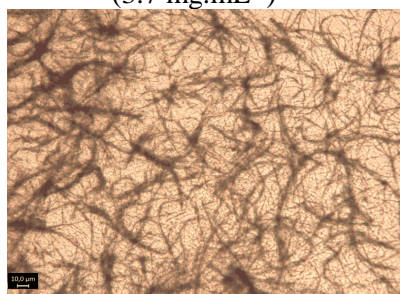

*p*-Xylene  
(3.7 mg.mL<sup>-1</sup>)

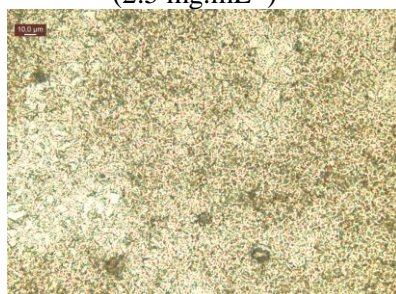

1,1,2,2-Tetrachloroethane  
(2.5 mg.mL<sup>-1</sup>)

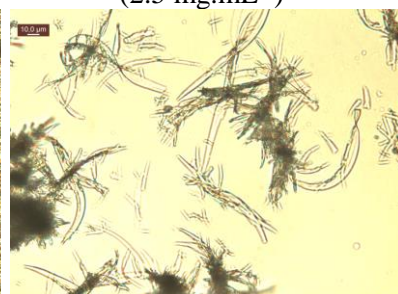

N,N-Dimethylformamide  
(10.0 mg.mL<sup>-1</sup>)

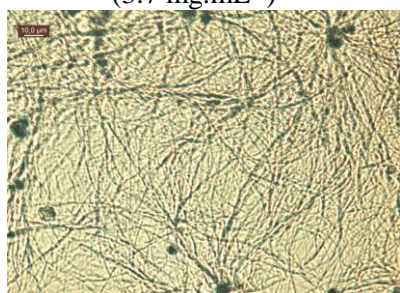

*o*-Dichlorobenzene  
(2.5 mg.mL<sup>-1</sup>)

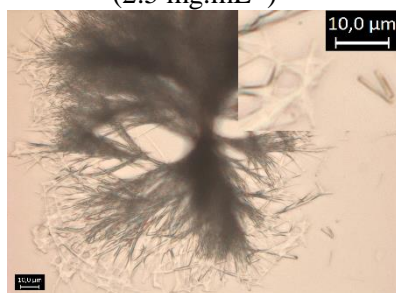

Octan-1-ol  
(12.5 mg.mL<sup>-1</sup>)

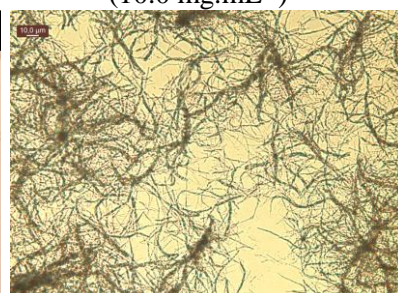

Tetralin  
(5 mg.mL<sup>-1</sup>)

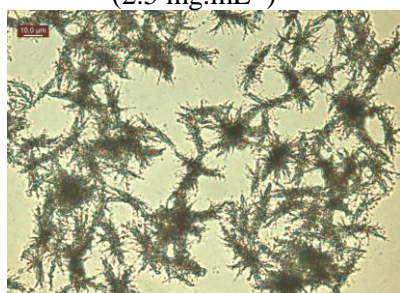

1,2,4-Trichlorobenzene  
(5 mg.mL<sup>-1</sup>)

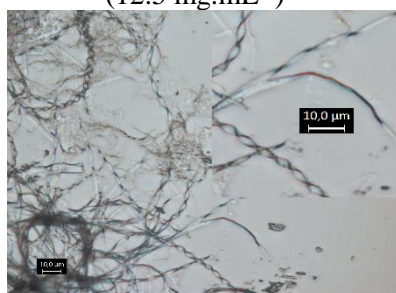

Hexadecane  
(5 mg.mL<sup>-1</sup>)

**Table S3.** Images of 2-based xerogels by optical microscopy depending on the solvent of preparation (the corresponding gels were prepared at a concentration  $C = 1.25 \times \text{CGC}$  and drop-casted).

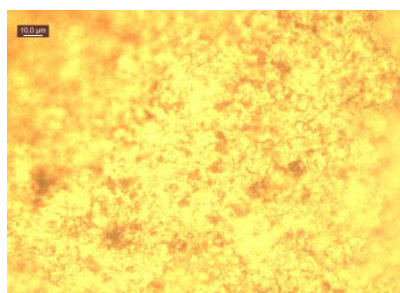

Chloroform  
(2.5 mg.mL<sup>-1</sup>)

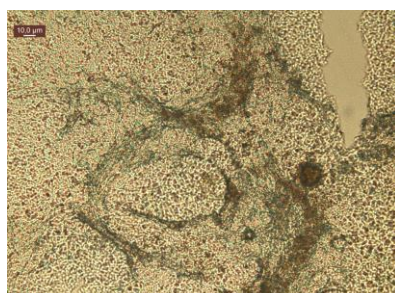

Tetrahydrofurane  
(2.5 mg.mL<sup>-1</sup>)

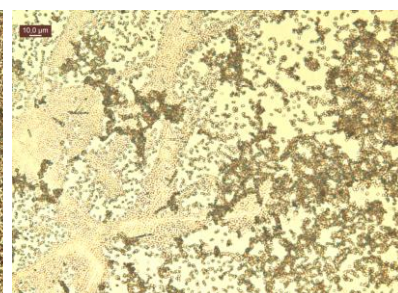

*tert*-Butanol  
(7.5 mg.mL<sup>-1</sup>)

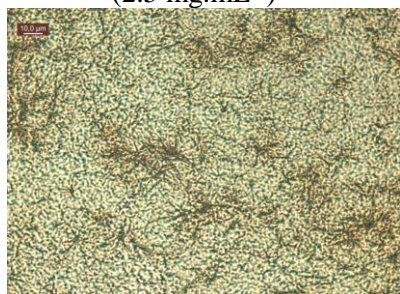

1,4-Dioxane  
(3.7 mg.mL<sup>-1</sup>)

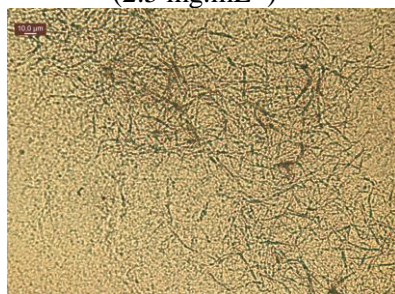

Toluene  
(2.5 mg.mL<sup>-1</sup>)

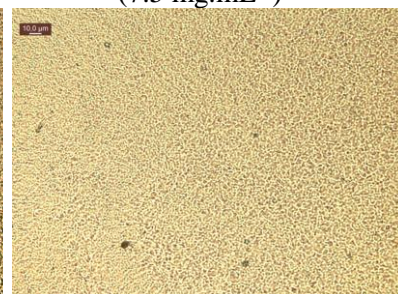

Chlorobenzene  
(2.5 mg.mL<sup>-1</sup>)

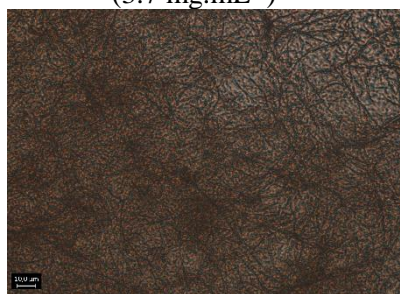

*p*-Xylene  
(3.7 mg.mL<sup>-1</sup>)

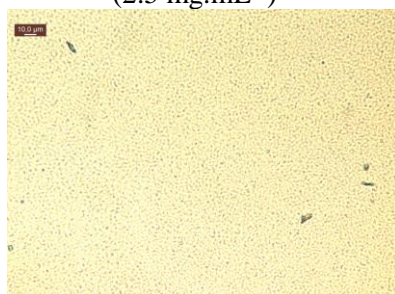

1,1,2,2-Tetrachloroethane  
(2.5 mg.mL<sup>-1</sup>)

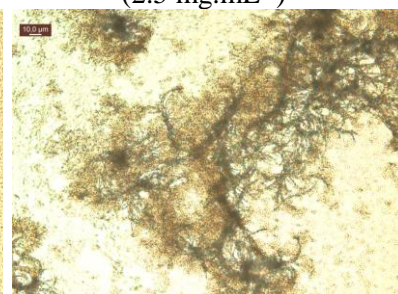

N,N-Dimethylformamide  
(10.0 mg.mL<sup>-1</sup>)

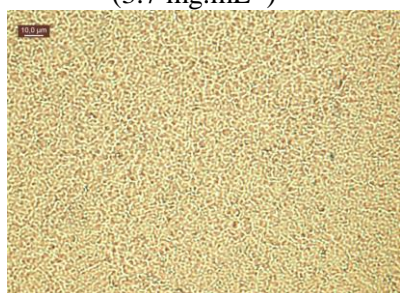

*o*-Dichlorobenzene  
(2.5 mg.mL<sup>-1</sup>)

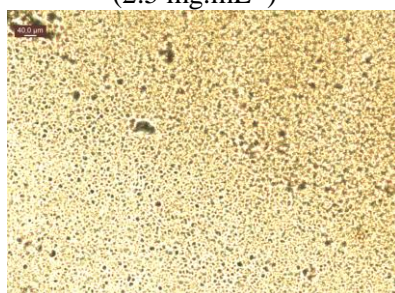

Octan-1-ol  
(12.5 mg.mL<sup>-1</sup>)

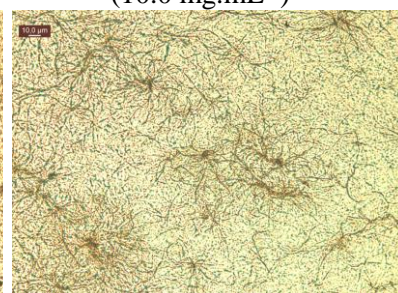

Tetralin  
(5 mg.mL<sup>-1</sup>)

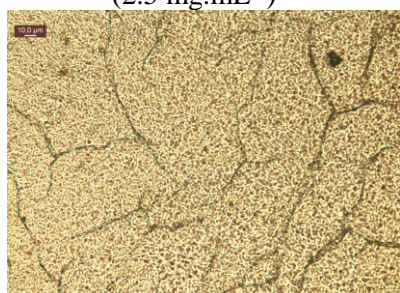

1,2,4-Trichlorobenzene  
(5 mg.mL<sup>-1</sup>)

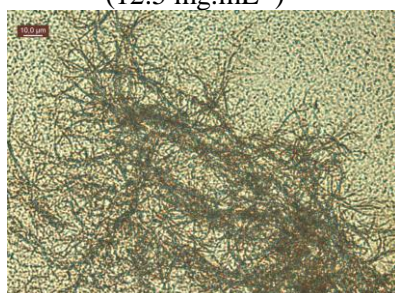

Hexadecane  
(5 mg.mL<sup>-1</sup>)

**Table S4.** Images of the slice, upper and lower faces of the alumina membranes by SEM microscopy depending on the method of deposition.

| Method     | Upper face                                                                          | Lower face                                                                           | Slice                                                                                 |
|------------|-------------------------------------------------------------------------------------|--------------------------------------------------------------------------------------|---------------------------------------------------------------------------------------|
| <i>i</i>   | 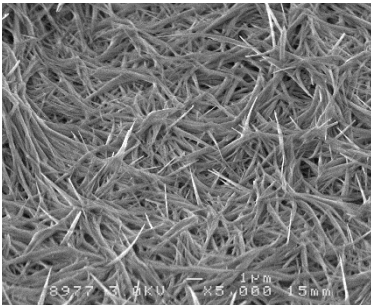   |    |    |
| <i>ii</i>  |    |    |    |
| <i>iii</i> |   |   |   |
| <i>iv</i>  |  |  |  |
| <i>v</i>   |  |  |  |

*vi*

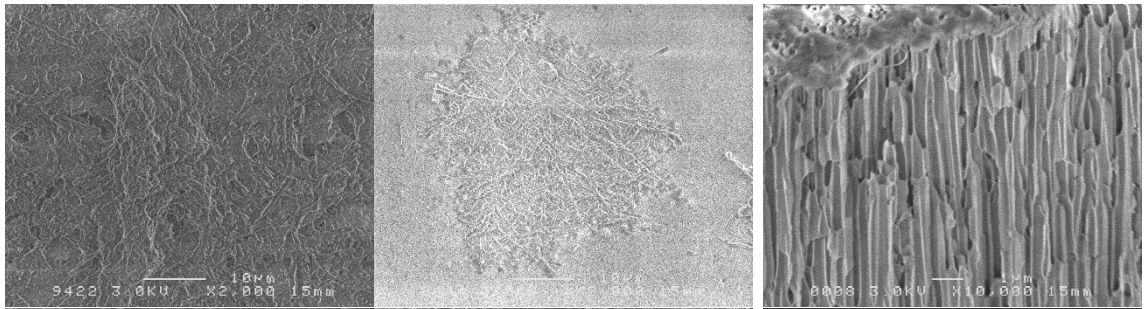

*vii*

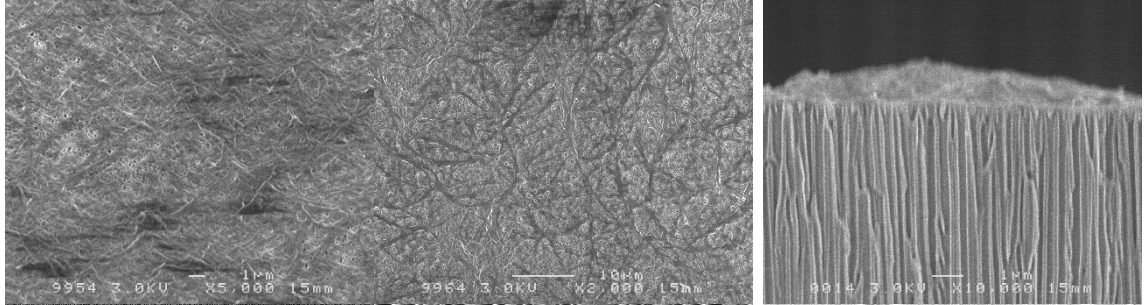

*viii*

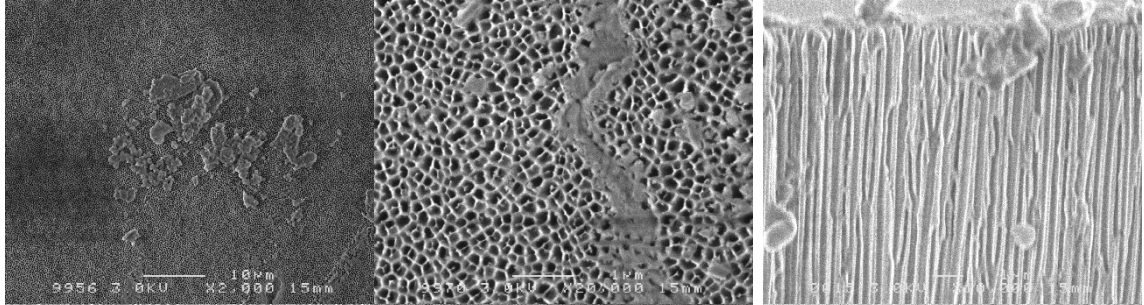

*ix*

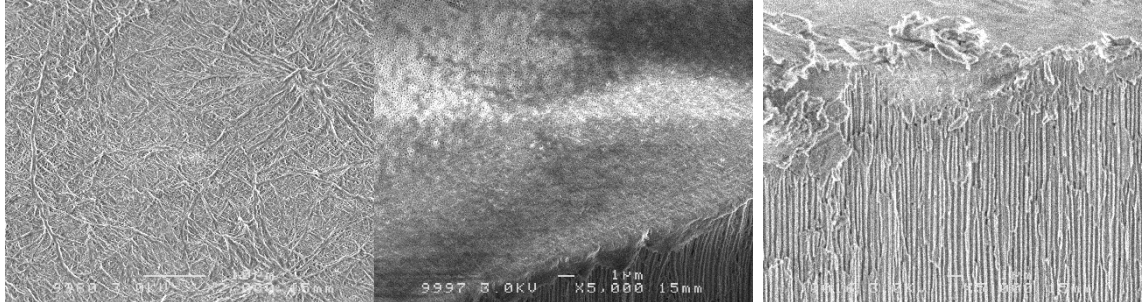



**Figure S4.**  $^1\text{H}$  NMR spectra of a sample of compound **1** before and after a DSC cycle ( $30^\circ\text{C} \rightarrow 120^\circ\text{C} \rightarrow 30^\circ\text{C}$ ).

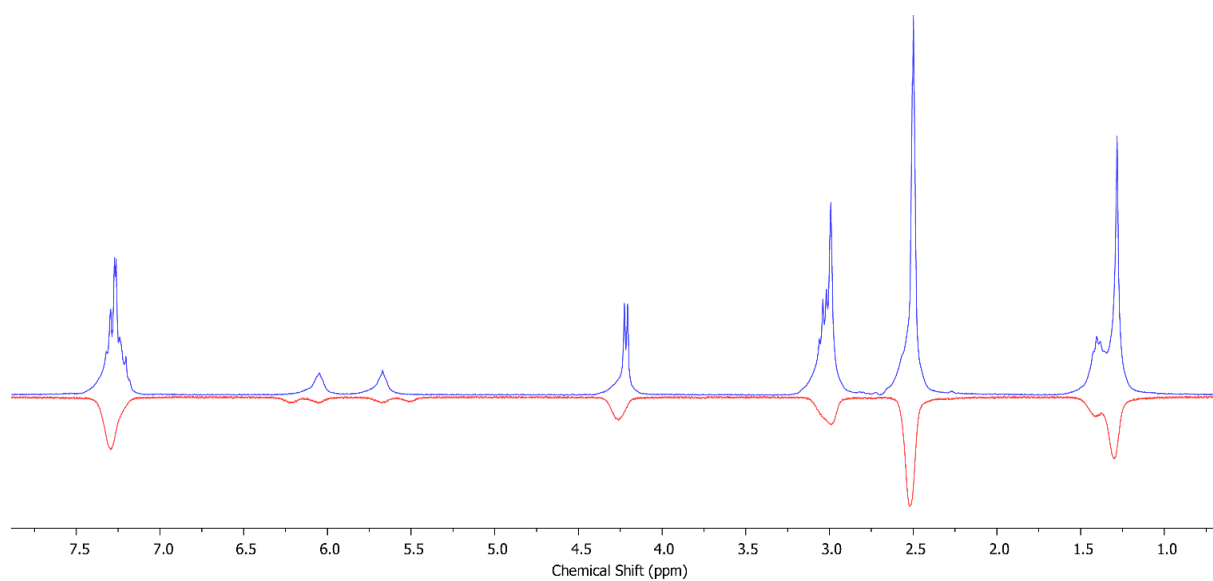

**Figure S5.** SEM micrographs of the **2**-based xerogel prepared from *o*DCB after one week in a 5M NaOH aqueous solution at  $80^\circ\text{C}$

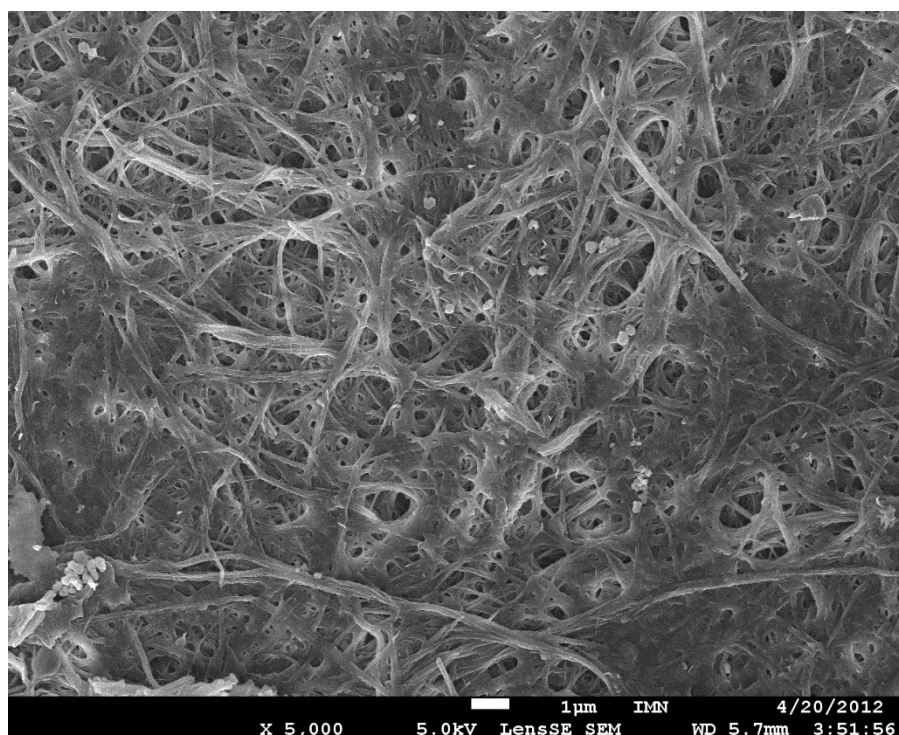

Supplement: c4nj00681j1.pdf [file c4nj00681j1.pdf]
